# Supplementary material for: Relative Risks for Dementia among Individuals with Glaucoma: A Meta-Analysis of Observational Cohort Studies
Source: PubMed Central journal article supplement — Korean J Ophthalmol. 2023 Oct 25;37(6):490–500. doi: 10.3341/kjo.2023.0059 (PMC10721395; doi:10.3341/kjo.2023.0059), 2023-10-25
Supplement: kjo-2023-0059-Supplementary-Table-1.pdf [file kjo-2023-0059-Supplementary-Table-1.pdf]

**Supplementary Table 1.** Search strategy

| No. | Category             | Search query                                                                                                                                                                           |
|-----|----------------------|----------------------------------------------------------------------------------------------------------------------------------------------------------------------------------------|
| 1   | Population (disease) |                                                                                                                                                                                        |
|     | PubMed and Cochrane  | “Dementia”[MeSH] OR “Dementia”[Tiab] OR “Alzheimer”[Tiab] OR “Alzheimer disease”[Tiab] OR “AD”[Tiab]                                                                                   |
|     | Embase               | ‘Dementia’/exp OR ‘Alzheimer’ OR ‘AD’                                                                                                                                                  |
| 2   | Exposure             |                                                                                                                                                                                        |
|     | PubMed and Cochrane  | “Glaucoma”[MeSH] OR “Glaucoma”[Tiab] OR “OAG”[Tiab] OR “POAG”[MeSH] OR “NTG”[Tiab] OR “ACG”[Tiab]                                                                                      |
|     | Embase               | ‘Glaucoma’ OR ‘OAG’ OR ‘POAG’ OR ‘NTG’ OR ‘ACG’                                                                                                                                        |
| 3   | Outcome              |                                                                                                                                                                                        |
|     | PubMed and Cochrane  | “Risk factors”[MeSH] OR “Risk factors”[Tiab] OR “Risk factor”[Tiab] OR “Determinants”[Tiab] OR “Determinant”[Tiab] OR “Association”[MeSH] OR “Association”[Tiab] OR “Associated”[Tiab] |
|     | Embase               | ‘Risk factor’/exp OR ‘Risk factors’ OR ‘Determinants’ OR ‘Determinant’ OR ‘Association’/exp OR ‘Associated’                                                                            |
| 4   | Final search         | 1 AND 2 AND 3                                                                                                                                                                          |
